# Supplementary material for: Intron-containing RNA from the HIV-1 provirus activates type I interferon and inflammatory cytokines
Source: PubMed Central journal article supplement (PMC6294009; doi:10.1038/s41467-018-07753-2), 2018-12-13
Supplement: 41467_2018_7753_MOESM1_ESM.pdf [file 41467_2018_7753_MOESM1_ESM.pdf]

Supplement for:

**Intron-containing RNA from the HIV-1 provirus activates type I  
interferon and inflammatory cytokines**

Sean Matthew McCauley, Kyusik Kim, Anetta Nowosielska, Ann Dauphin, Leonid Yurkovetskiy,  
William Edward Diehl, and Jeremy Luban

**Including:**

**Supplementary Figures 1, 2, 3, and 4 with corresponding Figure Legends.**

**Supplementary Tables 1, 2, 3, 4**

# Supplementary Figure 1

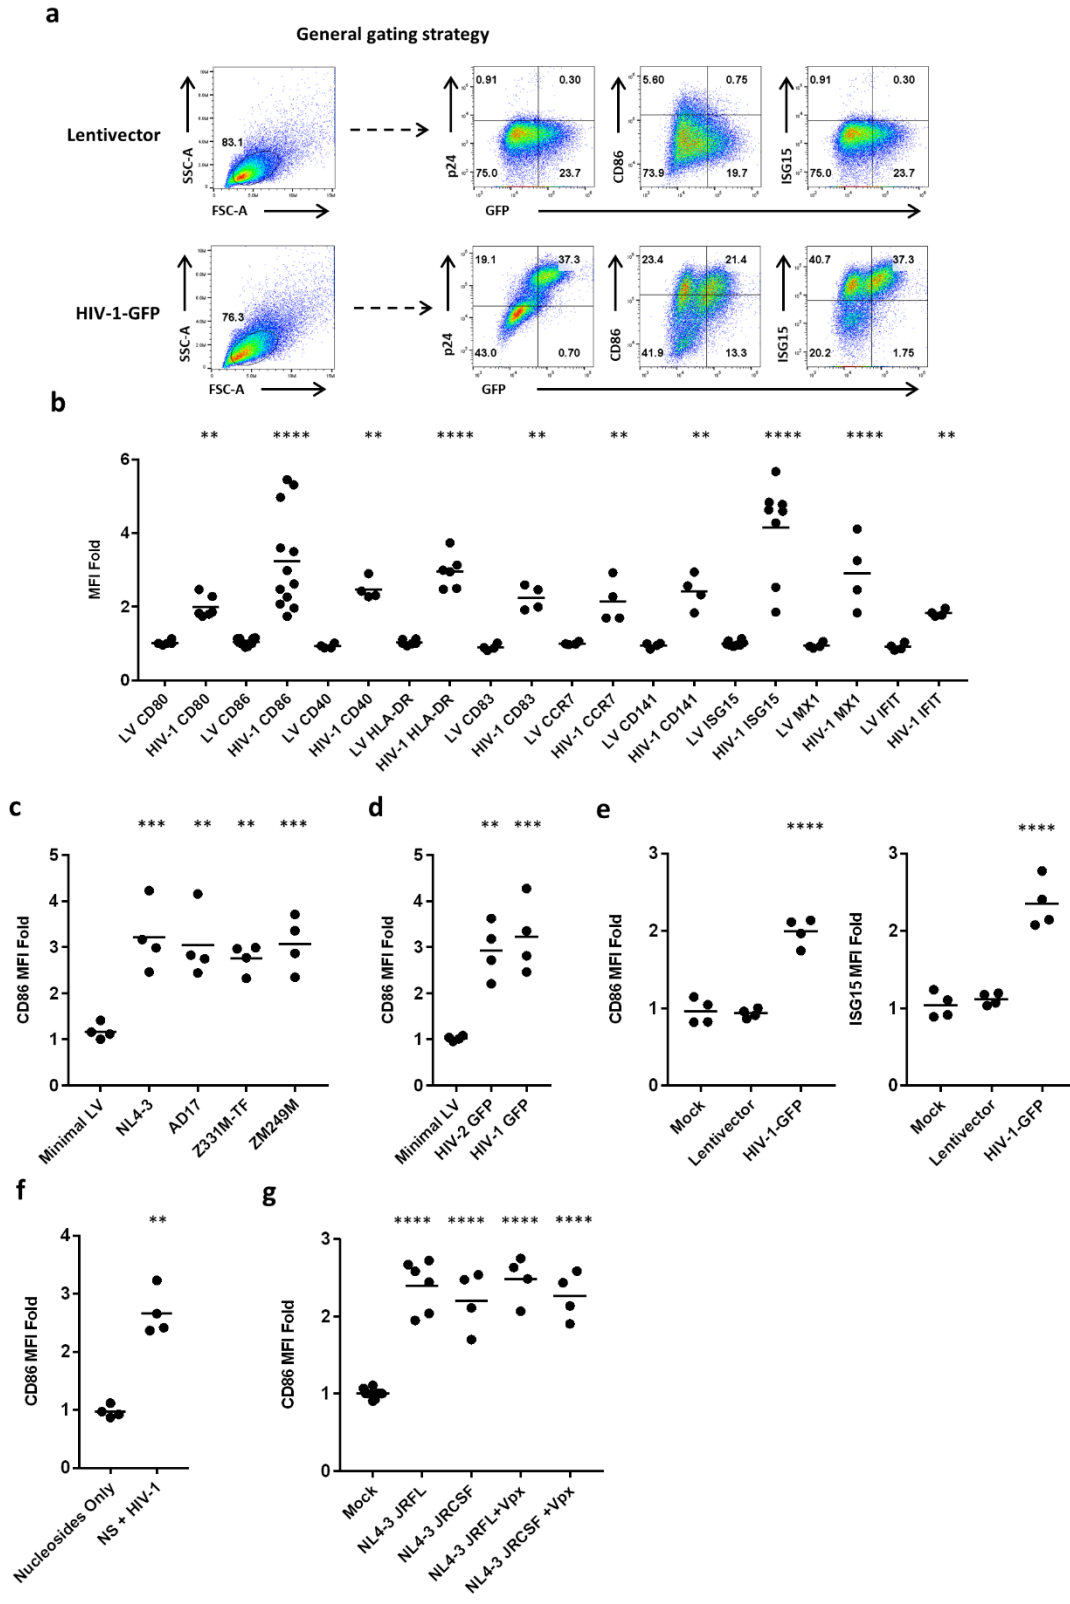

## Supplementary Figure 1

**a**, Gating strategy for all flow cytometry data presented in this manuscript. **b**, Data for Figure 1b and 1c showing the mean fluorescence intensity of various markers of innate activation in DCs transduced with HIV-1-GFP vs minimal lentivector. **c**, Data for Figure 1d of CD86 MFI on DCs transduced with several single cycle molecular clones. **d**, Data for Figure 1e of DC transductions of HIV-2-GFP single cycle vector. **e**. Data for Figure 1f of DCs treated with the supernatant of autologous DCs transduced with HIV-1 vectors. **f**, Data for Figure 1g of DC HIV-1-GFP transductions using nucleosides to enhance infectivity. **g**, Data for Figure 1h of spreading infections of Mac tropic or T cell tropic HIV-1 on DCs treated with or without Vpx. Significance was calculated in all cases by one-way ANOVA with Dunnett's post-test comparing test against minimal lentivector negative. (\* =  $p \leq 0.05$ , \*\* =  $p \leq 0.01$ , \*\*\* =  $p \leq 0.001$ , \*\*\*\* =  $p \leq 0.0001$ ).

## Supplementary Figure 2

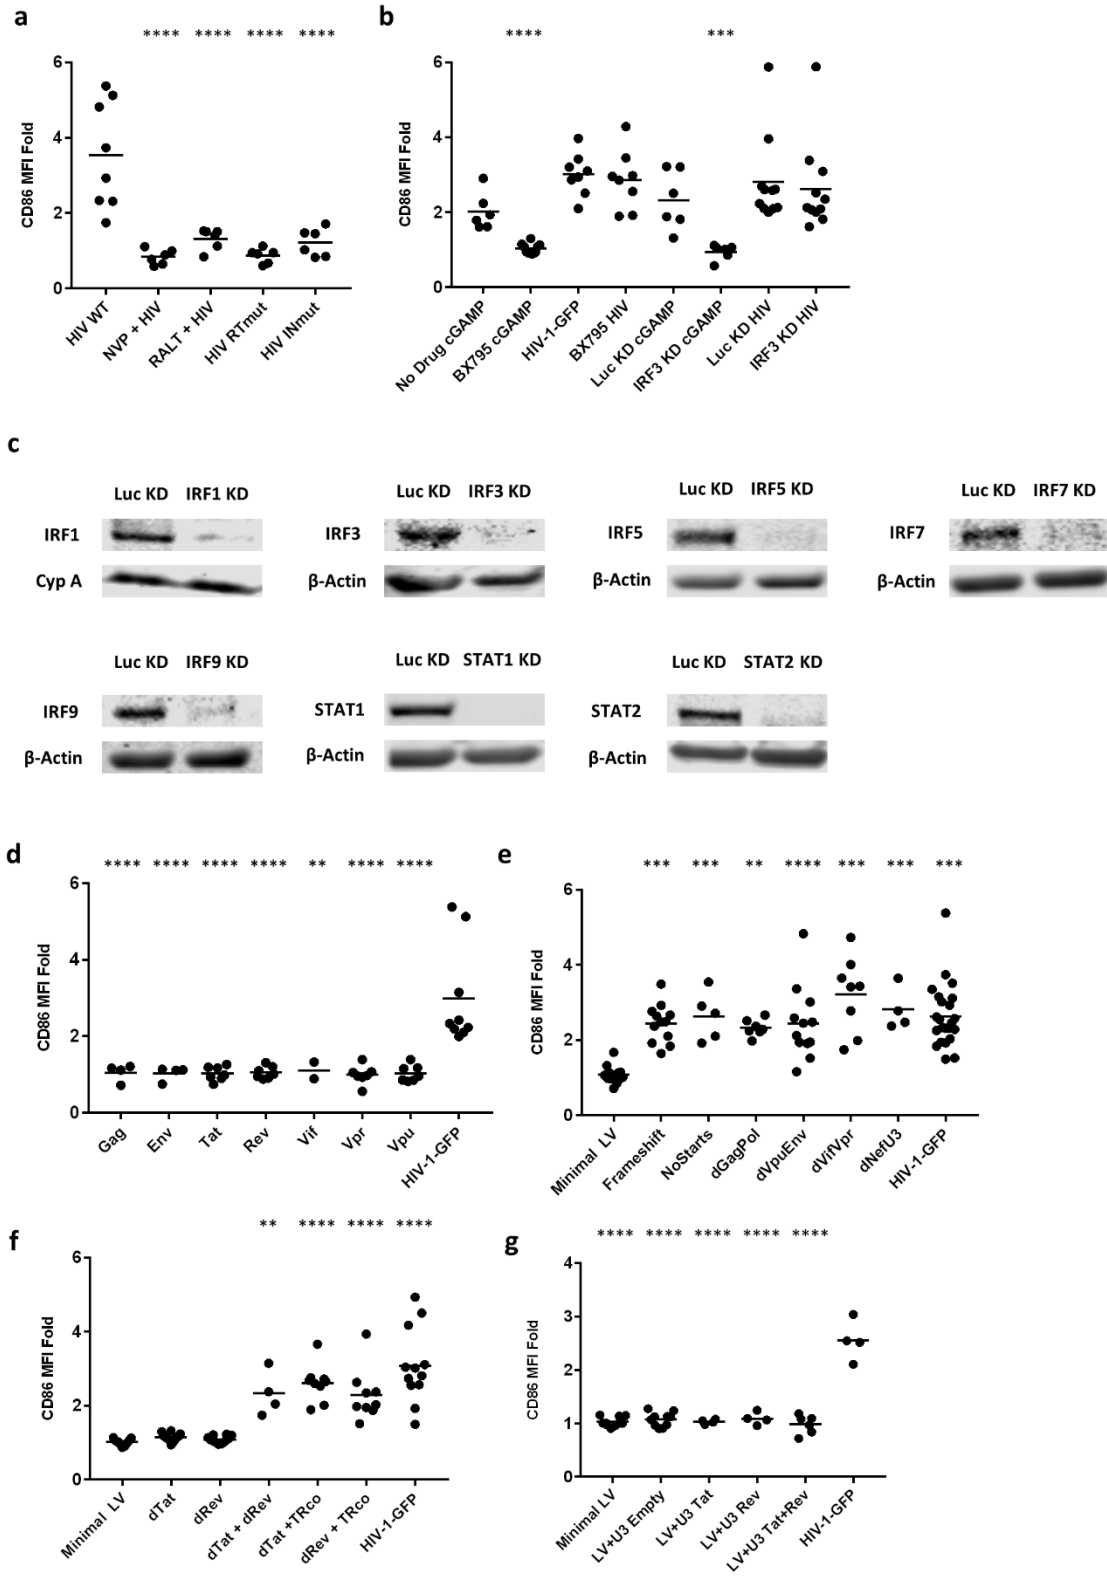

## Supplementary Figure 2

**a**, Data for Figure 2a showing the mean fluorescence intensity of CD86 of DC transduced with HIV-1 RT or IN mutants or inhibitors to RT and IN. **b**, Data for Figure 2b of DC TBK1 inhibition or DC IRF3 knockdowns challenged with either cGAMP or HIV-1-GFP. **c**, Western blots of DC knockdowns for IRF1, 3, 5, 7, 9 and STAT 1 and 2. **d**, Data for Figure 2d of DC transduced with minimal lentivectors expressing HIV-1 genes. **e**, Data for Figures 2e and 2f of DC transductions of HIV-1 mutants and truncations. **f**, Data for Figure 2g of DCs transduced with HIV-1 containing mutations to Tat or Rev as well as their rescue *in trans*. **g**, Data for Figure 2h of DCs transduced with minimal lentivectors designed to transcribe from the HIV-1 LTR. Significance was calculated in all cases by one-way ANOVA with Dunnett's post-test comparing test against minimal lentivector negative. (\* =  $p \leq 0.05$ , \*\* =  $p \leq 0.01$ , \*\*\* =  $p \leq 0.001$ , \*\*\*\* =  $p \leq 0.0001$ ).

Supplementary Figure 3

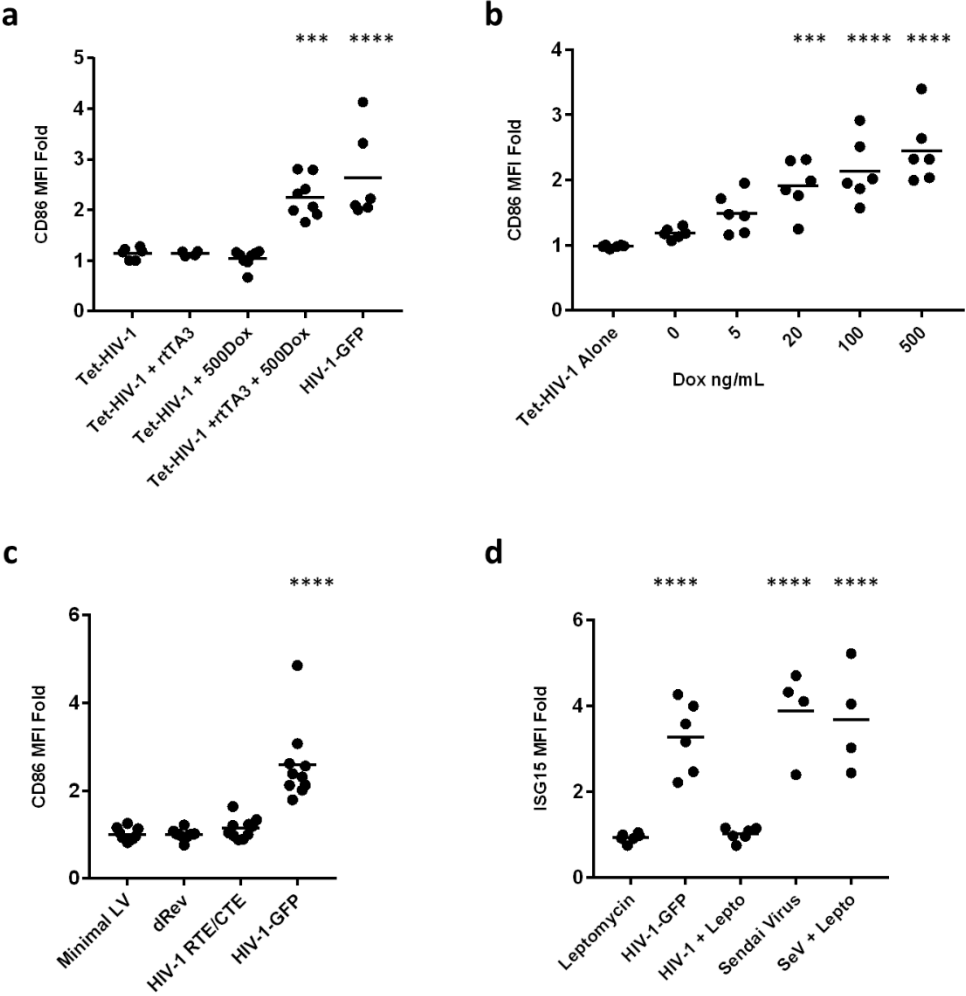

### Supplementary Figure 3

**a**, Data for Figure 3a of CD86 MFI on DCs transduced with Tet-HIV-1 with and without rtTA3 *in trans* and doxycycline. **b**, Data for Figure 3b of doxycycline titration on Tet-HIV-1 and rtTA3 transduced DCs. **c**, Data for Figure 3c of DCs transduced with HIV-1 containing the RTE<sub>m26</sub>CTE Tap1 export element. **d**, Data for Figure 3d and 3e of ISG15 MFI on DCs treated with or without Leptomycin and challenged with HIV-1-GFP or Sendai virus. Significance was calculated in all cases by one-way ANOVA with Dunnett's post-test comparing test against minimal lentivector negative. (\* =  $p \leq 0.05$ , \*\* =  $p \leq 0.01$ , \*\*\* =  $p \leq 0.001$ , \*\*\*\* =  $p \leq 0.0001$ ).

# Supplementary Figure 4

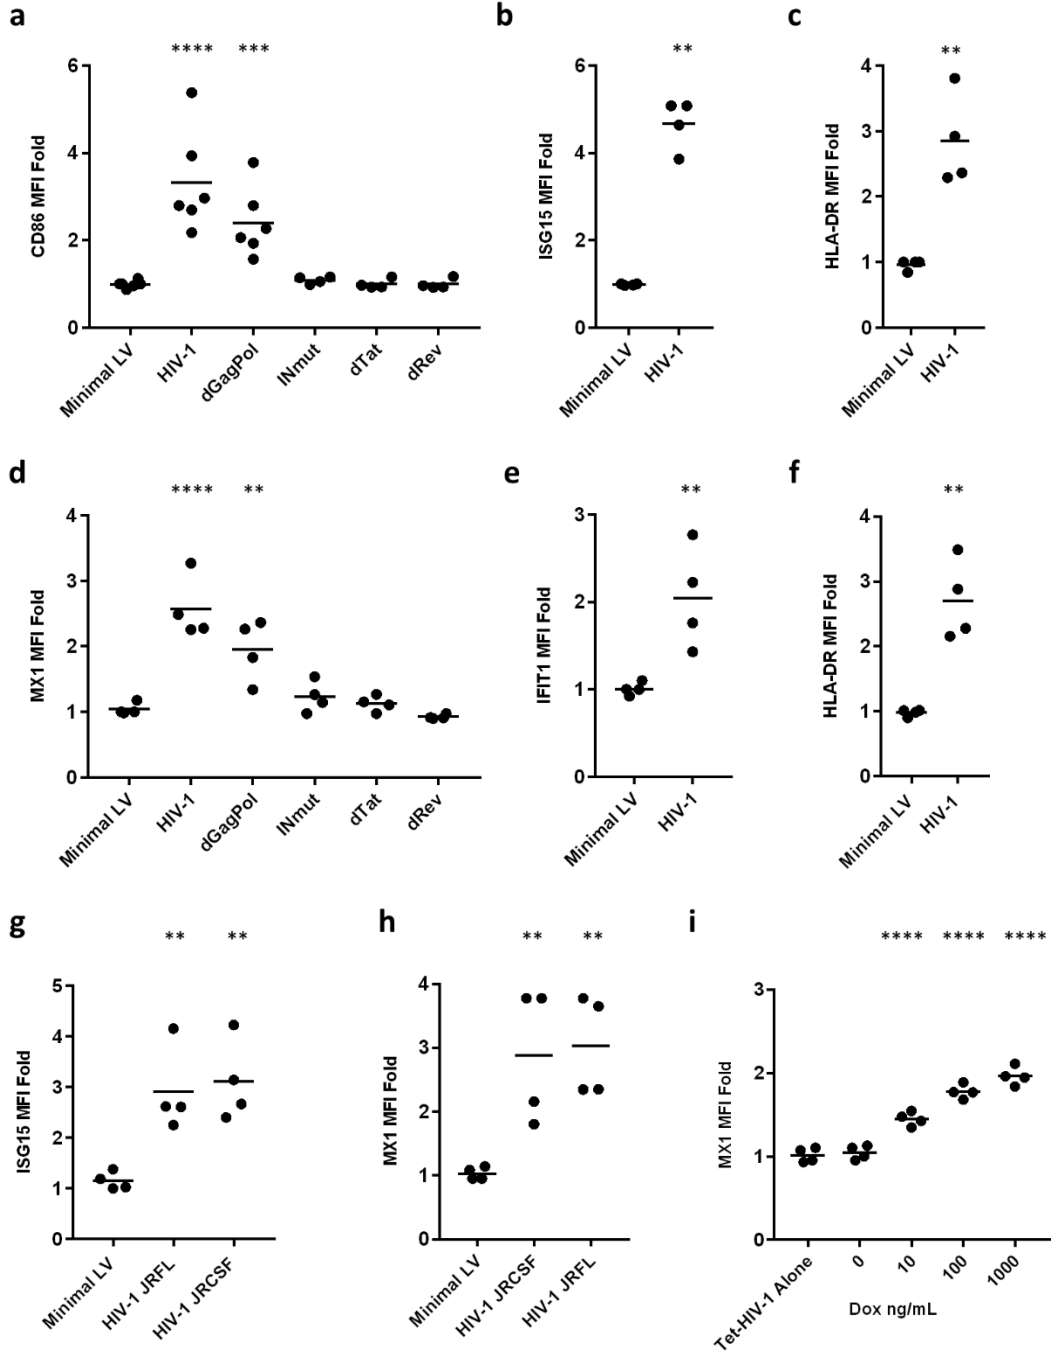



#### **Supplementary Figure 4**

**a**, Data for Figure 4a and 4b of CD86 MFI of Macrophages transduced with HIV-1-GFP and select mutants. **b**, Data for Figure 4a of ISG15 MFI on HIV-1-GFP transduced Macrophages. **c**, Data for Figure 4a of HLA-DR MFI on HIV-1 transduced Macrophages. **d**, Data for Figure 4a and 4b of MX-1 MFI of CD4+ T cells transduced with HIV-1-GFP and select mutants. **e**, Data for Figure 4a of MX-1 IFIT1 on HIV-1-GFP transduced CD4+ T cells. **f**, Data for Figure 4a of HLA-DR MFI on HIV-1-GFP transduced CD4+ T cells. **g**, Data for Figure 4c of ISG15 MFI of spreading infections of Mac tropic or T cell tropic HIV-1 on CD4+ T cells. **h**, The same samples as in “**g**” but of MX1 MFI. **i**, Data for Figure 4d of MX1 MFI of doxycycline titration on CD4+ T cells transduced with Tet-HIV-1 and rtTA3. Significance was calculated in all cases by one-way ANOVA with Dunnett’s post-test comparing test against minimal lentivector negative. (\* =  $p \leq 0.05$ , \*\* =  $p \leq 0.01$ , \*\*\* =  $p \leq 0.001$ , \*\*\*\* =  $p \leq 0.0001$ ).

**Supplementary Table 1. Plasmids used in this study.**

| Plasmid Name                                                         | Purpose                                  | Notes                                                                                                                                                                                                                                                 | Addgene code # |
|----------------------------------------------------------------------|------------------------------------------|-------------------------------------------------------------------------------------------------------------------------------------------------------------------------------------------------------------------------------------------------------|----------------|
| pBS NL4-3 <i>env</i> <sup>FS</sup> eGFP                              | Single-cycle, full-length HIV-1          | "HIV-1-GFP" in the manuscript. HIV-1 NL4-3 in pBluescript, flanking host sequences deleted, frameshift in <i>env</i> , eGFP in place of <i>nef</i> <sup>11</sup>                                                                                      | 101317         |
| pUC57mini NL4-3 $\Delta env$ eGFP                                    | HIV-1 clade B molecular clone            | Molecular clone of NL4-3 with deletion of 79 nucleotides following the Env signal peptide and eGFP in place of <i>nef</i>                                                                                                                             | 101318         |
| pUC57mini AD17 $\Delta env$ eGFP                                     | HIV-1 clade B molecular clone            | Molecular clone of transmitted/founder virus HIV-1 <sub>AD17</sub> <sup>20</sup> with deletion of 79 nucleotides following the Env signal peptide and eGFP in place of <i>nef</i>                                                                     | 101319         |
| pUC57mini Z331M-TF $\Delta env$ eGFP                                 | HIV-1 clade C molecular clone            | Molecular clone of transmitted/founder virus HIV-1 <sub>Z331M-TF</sub> <sup>21</sup> with deletion of 79 nucleotides following the Env signal peptide and eGFP in place of <i>nef</i>                                                                 | 101320         |
| pUC57mini ZM249M $\Delta env$ eGFP                                   | HIV-1 clade C molecular clone            | Molecular clone of transmitted/founder virus HIV-1 <sub>ZM249M</sub> <sup>22</sup> with deletion of 79 nucleotides following the Env signal peptide and eGFP in place of <i>nef</i>                                                                   | 101321         |
| pMD2.G                                                               | VSV G                                    | Pseudotype HIV-1 vectors with VSV G                                                                                                                                                                                                                   | 12259          |
| psPAX2                                                               | HIV-1 <i>gag-pol</i>                     | "3-part" lentivector or for complementation of assembly-incompetent HIV-1 vectors                                                                                                                                                                     | 12260          |
| SIVgpx                                                               | SIV <sub>MAC251</sub> <i>gag-pol/vpx</i> | Production of SIV VLPs containing Vpx protein                                                                                                                                                                                                         | 101322         |
| pALPS <sup>12</sup>                                                  | Minimal lentivector                      | Includes <i>cis</i> -acting elements required for reverse transcription and integration, psi RNA packaging element, RRE, cPPT, PPT, mutation in the 3'LTR U3 that eliminates LTR-based transcription, and SFFV promoter to express genes of interest. | 90996          |
| pALPS eGFP                                                           | eGFP lentivector                         | Encodes eGFP                                                                                                                                                                                                                                          | 101323         |
| pALPS <i>gag</i>                                                     | <i>gag</i> lentivector                   | Encodes codon optimized NL4-3 <i>gag</i>                                                                                                                                                                                                              | 101324         |
| pALPS <i>env</i>                                                     | <i>env</i> lentivector                   | Encodes codon optimized JR-CSF <i>env</i>                                                                                                                                                                                                             | 101325         |
| pALPS <i>tat</i>                                                     | <i>tat</i> lentivector                   | Encodes codon optimized NL4-3 <i>tat</i>                                                                                                                                                                                                              | 101326         |
| pALPS <i>rev</i>                                                     | <i>rev</i> lentivector                   | Encodes codon optimized NL4-3 <i>rev</i>                                                                                                                                                                                                              | 101327         |
| pALPS <i>vif</i>                                                     | <i>vif</i> lentivector                   | Encodes codon optimized NL4-3 <i>vif</i>                                                                                                                                                                                                              | 101328         |
| pALPS <i>vpr</i>                                                     | <i>vpr</i> lentivector                   | Encodes codon optimized NL4-3 <i>vpr</i>                                                                                                                                                                                                              | 101329         |
| pALPS <i>vpu</i>                                                     | <i>vpu</i> lentivector                   | Encodes codon optimized NL4-3 <i>vpu</i>                                                                                                                                                                                                              | 101330         |
| pALPS <i>tat</i> -P2A- <i>rev</i>                                    | <i>tat</i> and <i>rev</i> lentivector    | Lentivector expressing codon optimized NL4-3 <i>tat</i> and <i>rev</i> linked by P2A peptide coding sequence (GSGATNFSLKQAGDVEENPGP)                                                                                                                  | 101331         |
| pBS NL4-3 <i>env</i> <sup>FS</sup> eGFP RT-D185K/D186L <sup>25</sup> | RT mutant                                | pBS NL4-3 <i>env</i> <sup>FS</sup> eGFP with mutation that disrupts RT catalytic activity                                                                                                                                                             | 101332         |

|                                                                    |                                                                |                                                                                                                         |        |
|--------------------------------------------------------------------|----------------------------------------------------------------|-------------------------------------------------------------------------------------------------------------------------|--------|
| pBS NL4-3 <i>env</i> <sup>FS</sup><br>eGFP IN-D116A <sup>25</sup>  | IN mutant                                                      | pBS NL4-3 <i>env</i> <sup>FS</sup> eGFP with mutation that<br>disrupts IN catalytic activity                            | 101333 |
| pBS NL4-3 <i>env</i> <sup>FS</sup><br>eGFP PR-D25A <sup>25</sup>   | PR mutant                                                      | pBS NL4-3 <i>env</i> <sup>FS</sup> eGFP with mutation that<br>disrupts Protease catalytic activity                      | 101334 |
| pALPS puro<br>miR30-L1221 <sup>12</sup>                            | Luciferase<br>knockdown                                        | negative control for knockdowns<br>target site: CTTGTTCGATGAGAGCGTTTGT                                                  | 101335 |
| pALPS puro<br>miR30-IRF1 <sup>12</sup>                             | IRF1 knockdown                                                 | Target site TTGCTCTTAGCATCTCGGCTG                                                                                       | 117156 |
| pALPS puro<br>miR30-IRF3 <sup>12</sup>                             | IRF3 knockdown                                                 | Target site ATCAGATCTACAATGAAGGGC                                                                                       | 101336 |
| pALPS puro<br>miR30-IRF5 <sup>12</sup>                             | IRF5 knockdown                                                 | Target site TATTTCCCTGTCTCCTTGCC                                                                                        | 117157 |
| pALPS puro<br>miR30-IRF7 <sup>12</sup>                             | IRF7 knockdown                                                 | Target site ATAAGGAAGCACTCGATGTCG                                                                                       | 117158 |
| pALPS puro<br>miR30-IRF9 <sup>12</sup>                             | IRF9 knockdown                                                 | Target site AATTATCACAAAGAGGACAGG                                                                                       | 117159 |
| pALPS puro<br>miR30-STAT1 <sup>12</sup>                            | STAT1<br>knockdown                                             | Target site ATATCCAGTTCCTTTAGGGCC                                                                                       | 117160 |
| pALPS puro<br>miR30-STAT2 <sup>12</sup>                            | STAT2<br>knockdown                                             | Target site TTTAAGTTCCACAGACTTGA                                                                                        | 117161 |
| pALPS puro<br>miR30-TAK1 <sup>12</sup>                             | TAK1 knockdown                                                 | Target site<br>AGCGCCCTTCAATGGAGGAAAT                                                                                   | 117162 |
| pALPS_3'LTR<br>GFP@gag start<br>SFFV-                              | U3+ lentivector<br>GFP at <i>gag</i> start<br>SFFV promoter    | Repaired U3 allows LTR-based transcription<br>by the provirus with GFP as a marker for<br>expression. WPRE was deleted. | 101337 |
| pALPS_3'LTR<br>GFP@gag start<br>SFFV <i>tat</i>                    | U3+ lentivector<br>GFP at <i>gag</i> start<br>SFFV- <i>tat</i> | LTR drives GFP and internal SFFV promoter<br>drives codon optimized <i>tat</i>                                          | 101338 |
| pALPS_3'LTR<br>GFP@gag start<br>SFFV <i>rev</i>                    | U3+ lentivector<br>GFP at <i>gag</i> start<br>SFFV- <i>rev</i> | LTR drives GFP and internal SFFV promoter<br>drives codon optimized <i>rev</i>                                          | 101339 |
| pALPS_3'LTR<br>GFP@gag start<br>SFFV <i>tat</i> -P2A- <i>rev</i>   | U3+ lentivector<br>with SFFV-<br><i>tat</i> P2A <i>rev</i>     | LTR drives GFP and internal SFFV promoter<br>drives codon optimized <i>tat</i> and <i>rev</i> .                         | 101340 |
| pNL4-3 <i>env</i> <sup>FS</sup><br>eGFP <i>gag</i> <sup>2xFS</sup> | No Gag<br>synthesis                                            | 1st frameshift is CG nucleotide insertion in<br>MA at nt 832. 2nd is a CTAG addition in CA<br>at nt 1508.               | 101341 |
| pNL4-3 <i>env</i> <sup>FS</sup><br>eGFP NoStarts                   | No Gag<br>synthesis                                            | All ATGs from the start of <i>gag</i> to NC mutated<br>to ATC except the first which was mutated to<br>ACG              | 101342 |
| pBS NL4-3 <i>env</i> <sup>FS</sup><br>eGFP $\Delta$ <i>gag/pol</i> | <i>gag-pol</i> deletion                                        | Deletion from the start of <i>gag</i> until 229 bases<br>before the cPPT                                                | 101343 |

|                                                                                                                          |                                                 |                                                                                                                                                                                                                                                   |        |
|--------------------------------------------------------------------------------------------------------------------------|-------------------------------------------------|---------------------------------------------------------------------------------------------------------------------------------------------------------------------------------------------------------------------------------------------------|--------|
| pNL4-3 <i>env</i> <sup>FS</sup><br>eGFP $\Delta$ <i>vif/vpr</i>                                                          | <i>vif/vpr</i> deletion                         | Deletion from NL4-3 nt 5582-6199 encompassing <i>Vif</i> and <i>Vpr</i> coding sequence                                                                                                                                                           | 101344 |
| pNL4-3 <i>env</i> <sup>FS</sup><br>eGFP $\Delta$ <i>vpu/env</i>                                                          | <i>vpu/env</i> deletion                         | Deletion from NL4-3 nt 6054-7489 encompassing all of <i>vpu</i> and <i>env</i> until before the RRE                                                                                                                                               | 101345 |
| pBS NL4-3 <i>env</i> <sup>FS</sup><br>eGFP $\Delta$ <i>nef/U3</i>                                                        | <i>nef/U3</i> deletion                          | Deletion from NL4-3 nt 8911-9022 and 9088-9377. This deletes <i>nef</i> and U3 LTR sequences                                                                                                                                                      | 101346 |
| pBS NL4-3 <i>env</i> <sup>FS</sup><br>eGFP 5'CMV $\Delta$ <i>tat</i>                                                     | HIV-1 with inactivating mutations in <i>tat</i> | <i>tat</i> ATG->ACG (silent in <i>vpr</i> reading frame), nt 78 mutated T->G to change Tyr to stop codon, nt 116 mutated T->C to disrupt Met, 5'LTR replaced with CMV-R-U5 from pALPS for <i>tat</i> -independent transcription in HEK293E cells. | 101347 |
| pBS NL4-3 <i>env</i> <sup>FS</sup><br>eGFP $\Delta$ <i>rev</i>                                                           | HIV-1 with inactivating mutations in <i>rev</i> | All mutations in <i>rev</i> are silent with respect to the <i>tat</i> reading frame. Start ATG->ACG and nts 68-71 were mutated AGC->TCA to change tyrosine to a stop.                                                                             | 101348 |
| pBS NL4-3 <i>env</i> <sup>FS</sup><br>eGFP 5'CMV $\Delta$ <i>tat</i><br>$\Delta$ TARx2 <sub>8</sub> d2TetOp <sup>2</sup> | Tet-inducible, <i>tat</i> -independent HIV-1    | 2xTet Operator inserted between NFkB and Sp1 sites in U3 of HIV-1 $\Delta$ <i>tat</i> with 5' CMV-R-U5. 5' and 3' TAR elements were mutated to: 5'-<br>GGTCTCTCTGGTTAGACCAGAAAGGAGC<br>ATTGGAGCTCTCTGGCTAACTAGGGAAC<br>CC-3'                      | 101349 |
| pALPS<br>rtTA3_V14 <sup>28</sup>                                                                                         | rtTA3 lentivector                               | Codon optimized rtTA3 used <i>in trans</i> with Tet inducible HIV-1                                                                                                                                                                               | 101350 |
| pSC101 NL4-3<br><i>env</i> <sup>FS</sup> $\Delta$ <i>rev</i> $\Delta$ RRE<br>RTE <sub>m</sub> 26CTE <sup>29</sup>        | Rev (CRM1) independent HIV-1                    | HIV-1 $\Delta$ Rev was cloned into pSC101 and modified to include an RTE <sub>m</sub> 26CTE element in order to utilize the NXF1 RNA export pathway. The RRE was also mutated.                                                                    | 101351 |

**Supplementary Table 2. Drugs and reagents.**

| <b>Drug</b>                       | <b>Action</b>                         | <b>Source</b>                    | <b>Working concentration</b> | <b>HIV-1 DC maturation</b> |
|-----------------------------------|---------------------------------------|----------------------------------|------------------------------|----------------------------|
| Doxycycline                       | rtTA3 activator                       | Sigma (D9891)                    | 10-1000 ng/mL                | -                          |
| cGAMP                             | STING activator                       | Invivogen (tlr-nacga23)          | 25 µg/mL                     | -                          |
| PHA-P                             | T cell mitogen                        | Sigma (L1668)                    | 5 µg/mL                      | -                          |
| 2'deoxyguanosine monohydrate      | For nucleoside assisted transductions | Sigma (D0901)                    | 2 mM                         | -                          |
| 2' deoxythymidine                 | For nucleoside assisted transductions | Sigma (T1895)                    | 2 mM                         | -                          |
| 2'deoxyadenosine monohydrate      | For nucleoside assisted transductions | Sigma (D8668)                    | 2 mM                         | -                          |
| 2'deoxyctidine hydrochloride      | For nucleoside assisted transductions | Sigma (D0776)                    | 2 mM                         | -                          |
| Sendai Virus (SeV) Cantell strain | Challenge virus                       | Charles River Labs (VR-907)      | 200 HA units/mL              | -                          |
| Nevirapine                        | Reverse transcriptase inhibitor       | NIH AIDS reagent program (4666)  | 5 µM                         | Inhibits                   |
| Raltegravir                       | Integrase inhibitor                   | NIH AIDS reagent program (11680) | 10 µM                        | Inhibits                   |
| Leptomycin                        | CRM1 inhibitor                        | Invivogen (tlr-lep)              | 25 nM                        | Inhibits                   |
| Cyclosporin A                     | Cyclophilin A inhibitor               | Sigma (30024)                    | 5 µM                         | No effect                  |
| GW-5075                           | c-Raf                                 | Sigma (G6416)                    | 1, 5, 25 µM                  | No effect                  |
| BAY11-7082                        | IκB-a Inhibitor                       | Invivogen (tlr-b82)              | 1, 2.5, 10 µM                | No effect                  |
| U0126                             | MEK1 and MEK2 Inhibitor               | Invivogen (tlr-u0126)            | 10, 25, 50 µM                | No effect                  |
| SB203580                          | p38 MAP Kinase Inhibitor              | Invivogen (tlr-sb20)             | 1, 2.5, 10 µM                | No effect                  |
| MCC950                            | NLRP3-inflammasome inhibitor          | Invivogen (inh-mcc)              | 1, 2.5, 10 µM                | No effect                  |
| SP600125                          | JNK Inhibitor                         | Invivogen (tlr-sp60)             | 10, 25, 100 µM               | No effect                  |

|                       |                                      |                        |                       |           |
|-----------------------|--------------------------------------|------------------------|-----------------------|-----------|
| Z-VAD-FMK             | Pan-Caspase Inhibitor                | Invivogen (tlrl-vad)   | 1, 5, 20 $\mu$ M      | No effect |
| NQDI-1                | ASK1 inhibitor                       | Sigma (SML0185)        | 1, 10, 100 $\mu$ M    | No effect |
| ISRIB                 | eIF2a phosphorylation inhibitor      | Sigma (SML0843)        | 1, 10, 100 $\mu$ M    | No effect |
| VX-765                | Caspase 1 inhibitor                  | Invivogen (inh-vx765i) | 1, 10, 100 $\mu$ M    | No effect |
| Dexamethasone         | NF-kB and MAPK inhibitor             | Invivogen (tlrl-dex)   | 10, 100, 1000 nM      | No effect |
| Chloroquine           | inhibitor of endosomal acidification | Invivogen (tlrl-chq)   | 1, 10, 100 $\mu$ M    | No effect |
| Amlexanox             | TBK1/IKK $\epsilon$ inhibitor        | Invivogen (inh-amx)    | 1, 10, 100 $\mu$ g/mL | No effect |
| BX795                 | TBK1/IKK $\epsilon$ inhibitor        | Invivogen (tlrl-bx7)   | 0.5, 1, 2 $\mu$ M     | No effect |
| NG25 trihydrochloride | TAK1 & LYN, MAP4K2 and Abl inhibitor | Sigma (SML1332)        | 50, 100, 500, 1000 nM | No effect |
| 5Z-7-Oxozeaenol       | TAK1 & MAP4K2 inhibitor              | Sigma (O9890)          | 50, 100, 500, 1000 nM | No effect |
| C16                   | PKR inhibitor                        | Sigma (I9785)          | 1 $\mu$ M             | No effect |
| 2AP                   | PKR inhibitor                        | Invivogen (tlrl-apr)   | 5 $\mu$ M             | No effect |

**Supplementary Table 3. qRT-PCR probes.**

| <b>RNA Target</b> | <b>Taqman probe ID#</b> |
|-------------------|-------------------------|
| CXCL10            | Hs00171042_m1           |
| IFNB1             | Hs01077958_s1           |
| IL15              | Hs01003716_m1           |
| OAZ1              | Hs00427923_m1           |
| ACTB              | Hs01060665_g1           |

**Supplementary Table 4. Antibodies used in this study.**

| <b>Target antigen</b> | <b>Clone</b> | <b>Fluorophore</b>  | <b>Source</b>  | <b>Dilution/<br/>Concentration</b> |
|-----------------------|--------------|---------------------|----------------|------------------------------------|
| CD80                  | 2D10         | PE, APC             | Biolegend      | 1:100                              |
| CD86                  | IT2.2        | PE, APC             | Biolegend      | 1:100                              |
| CD40                  | HB14         | APC                 | Biolegend      | 1:100                              |
| HLA-DR                | L249         | PerCP, APC          | Biolegend      | 1:100                              |
| CD83                  | HB15e        | FITC, APC           | Biolegend      | 1:100                              |
| CCR7                  | G043H7       | PE                  | Biolegend      | 1:100                              |
| CD141                 | M80          | PE                  | Biolegend      | 1:100                              |
| ISG15                 | #851701      | PE, APC             | R&D Systems    | 1:100                              |
| MX1                   | EPR19967     | N/A                 | Abcam          | 1:100                              |
| IFIT                  | OTI3G8       | N/A                 | Abcam          | 1:100                              |
| p24                   | KC57         | FITC, PE            | BeckmanCoulter | 1:200                              |
| CD1a                  | HI149        | FITC, PerCP         | Biolegend      | 1:100                              |
| CD1c                  | L161         | PE                  | Biolegend      | 1:100                              |
| CD14                  | HCD14        | FITC, Pe-Cy7        | Biolegend      | 1:100                              |
| CD11b                 | ICRF44       | PE                  | Biolegend      | 1:100                              |
| CD11c                 | 3.9          | PE, PE-Cy7, APC     | Biolegend      | 1:100                              |
| CD209 (DC-SIGN)       | 9E9A8        | APC                 | Biolegend      | 1:100                              |
| CXCL10                | JO34D6       | PE                  | Biolegend      | 1:100                              |
| HLA-ABC               | W6/32        | FITC                | Biolegend      | 1:100                              |
| CD3                   | OKT3         | FITC, APC, BV650    | Biolegend      | 1:100                              |
| CD4                   | OKT4         | FITC, APC, Alexa700 | Biolegend      | 1:100                              |
| Mouse-IgG             | Poly4053     | PE, APC             | Biolegend      | 1:100                              |
| Rabbit-IgG            | Poly4064     | PE, AlexaFluor647   | Biolegend      | 1:100                              |
| IRF1                  | 13H3A44      | N/A                 | Biolegend      | 1 ug/mL                            |



|       |         |     |                  |         |
|-------|---------|-----|------------------|---------|
| IRF3  | 11904S  | N/A | Cell Signal Tech | 1:1000  |
| IRF5  | 5A3A39  | N/A | Biolegend        | 1 ug/mL |
| IRF7  | 12G9A36 | N/A | Biolegend        | 1 ug/mL |
| IRF9  | 5A3A39  | N/A | Biolegend        | 1 ug/mL |
| STAT1 | 9176S   | N/A | Cell Signal Tech | 1:1000  |
| STAT2 | 4594S   | N/A | Cell Signal Tech | 1:1000  |
